# Supplementary material
Source: PubMed Central journal article supplement (PMC5691347)

# Suppl. Fig.1

Gremlin staining in plexiform lesions

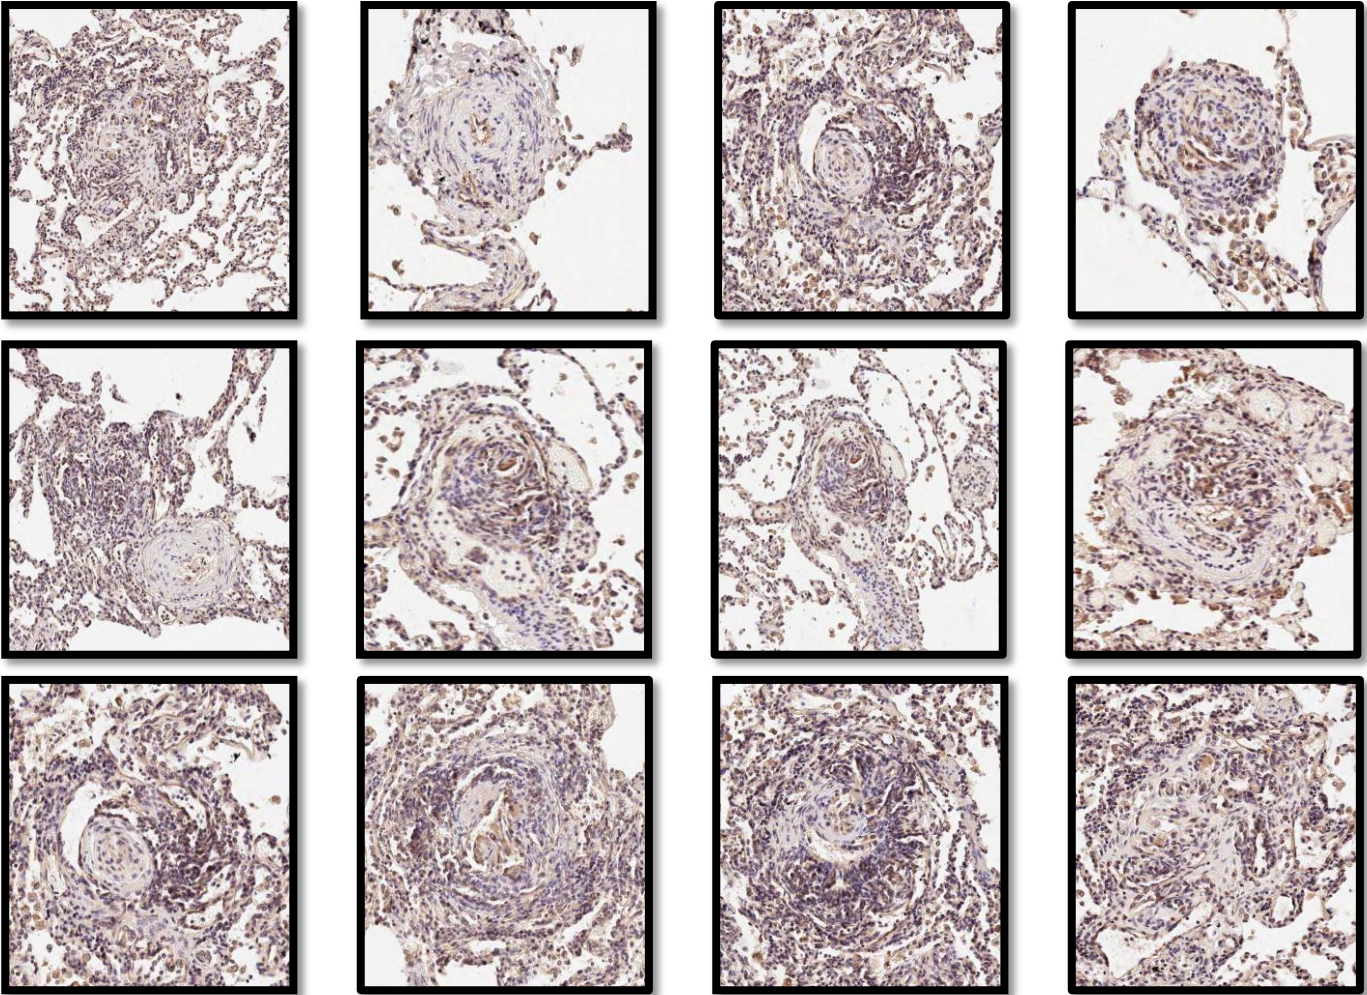

20x

Supplement: mmc1.pdf [file mmc1.pdf]

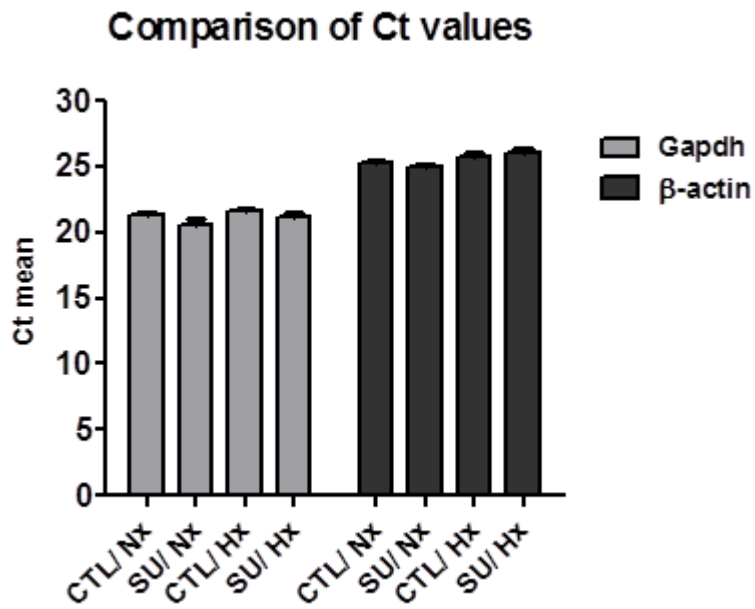

Supplement: mmc3.pdf [file mmc3.pdf]
